# Supplementary material
Source: PubMed Central journal article supplement (PMC9634601)
Supplement: jama-e2219626-s001.pdf [file jama-e2219626-s001.pdf]

## Supplemental Online Content

Fielding-Singh V, Vanneman MW, Grogan T, et al. Association between preoperative hemodialysis timing and postoperative mortality in patients with end-stage kidney disease. *JAMA*. Published online November 3, 2022. doi:10.1001/jama.2022.19626

**eTable 1.** Clinical Classifications Software Organ System Groups

**eTable 2.** Current Procedural Terminology Codes for Common Surgical Procedures Subgroup Analysis

**eTable 3.** Clinical Classification Software Categories for Minor Eye, Skin, and Vascular Procedures Subgroup Analysis

**eTable 4.** Supplemental Patient Characteristics by Days Between Last Hemodialysis and Procedure

**eTable 5.** Common Clinical Classification Software Procedure Categories

**eTable 6.** Patient and Procedure Characteristics, by Presence of an Additional Hemodialysis Session on the Day of Procedure

**eTable 7.** Primary Outcome Model—Alternative Reference Levels for Same-Day Hemodialysis Subgroup Analysis

**eTable 8.** Post Hoc Secondary Outcome and Subdistribution Hazard Models

**eTable 9.** Sensitivity Analyses—Association Between Days Between Last Hemodialysis and Procedure and 90-Day Postoperative Mortality

**eTable 10.** Secondary Outcome Models—Alternative Reference Levels for Same-Day Hemodialysis Subgroup Analysis

### eMethods

**eFigure 1.** Directed Acyclic Graph of Hypothesized Relationships Between Key Model Variables

**eFigure 2.** Cumulative Incidence of 30-Day Postoperative Mortality

**eFigure 3.** Ninety-Day Postoperative Mortality With and Without an Additional Same-Day Dialysis Session for Patients with 1 Day Between Last Hemodialysis and Surgery

**eFigure 4.** Love Plots for Unadjusted and Overlap-Weighted Models

### eReferences

This supplemental material has been provided by the authors to give readers additional information about their work.

**eTable 1. Clinical Classifications Software<sup>1</sup> Organ System Groups**

| <b>Clinical Classifications Software Category<sup>a</sup></b> | <b>Organ System Group</b>                 |
|---------------------------------------------------------------|-------------------------------------------|
| 1-9                                                           | Nervous system procedures                 |
| 10-12                                                         | Endocrine procedures                      |
| 13-21, 220                                                    | Eye procedures                            |
| 22-35                                                         | ENT and dental procedures                 |
| 36-42                                                         | Thoracic procedures                       |
| 43-63, 225                                                    | Cardiovascular procedures                 |
| 64-67                                                         | Hematologic procedures                    |
| 68-99, 8                                                      | Gastrointestinal and abdominal procedures |
| 100-118                                                       | Urologic procedures                       |
| 119-141                                                       | Obstetric and gynecologic procedures      |
| 142-164                                                       | Orthopedic procedures                     |
| 165-175                                                       | Skin and breast procedures                |

<sup>a</sup> Individual procedures within Clinical Classifications Software Category 176, Other organ transplantation, were redistributed within their respective organ system grouping.

**eTable 2.** Current Procedural Terminology Codes for Common Surgical Procedures Subgroup Analysis

| <b>Surgical Specialty</b> | <b>Surgical Procedure</b>  | <b>CPT Codes</b>                                                                                                                                                                                                                                           |
|---------------------------|----------------------------|------------------------------------------------------------------------------------------------------------------------------------------------------------------------------------------------------------------------------------------------------------|
| Bariatric                 | Gastric sleeve             | 43775, 43843                                                                                                                                                                                                                                               |
| Bariatric                 | Roux-en-Y gastric bypass   | 43644, 43645, 43846, 43847                                                                                                                                                                                                                                 |
| Cardiac                   | CABG                       | 33510, 33511, 33512, 33513, 33514, 33515, 33516, 33517, 33518, 33519, 33520, 33521, 33533, 33534, 33535, 33536                                                                                                                                             |
| Cardiac                   | Valve repair/ replacement  | 33400, 33401, 33402, 33403, 33404, 33405, 33406, 33407, 33408, 33409, 33410, 33411, 33412, 33413, 33414, 33415, 33416, 33417, 33420, 33421, 33422, 33423, 33424, 33425, 33426, 33427, 33428, 33429, 33430, 33496                                           |
| Cardiology                | TAVR                       | 33361, 33362, 33363, 33364, 33365, 33366                                                                                                                                                                                                                   |
| ENT                       | Endoscopic sinus surgery   | 31237, 31240, 31253, 31254, 31255, 31256, 31257, 31259, 31267, 31276, 31287, 31288                                                                                                                                                                         |
| ENT                       | Glossectomy                | 41135                                                                                                                                                                                                                                                      |
| ENT                       | Laryngectomy               | 31360, 31365, 31390, 31395                                                                                                                                                                                                                                 |
| ENT                       | Neck dissection            | 38724                                                                                                                                                                                                                                                      |
| ENT                       | Parotid                    | 42410, 42415, 42420                                                                                                                                                                                                                                        |
| ENT                       | Thyroid and parathyroid    | 60220, 60225, 60240, 60252, 60260, 60271, 60500                                                                                                                                                                                                            |
| General                   | Abdominal wall hernia      | 49560, 49561, 49565, 49566, 49585, 49587, 49652, 49653, 49654, 49655, 49659                                                                                                                                                                                |
| General                   | Appendectomy               | 44955, 44960, 44970, 44979                                                                                                                                                                                                                                 |
| General                   | Breast                     | 19120, 19125, 19160, 19162, 19180, 19240, 19301, 19302, 19303, 19307, 38500, 38525, 38745                                                                                                                                                                  |
| General                   | Cholecystectomy            | 47562, 47563, 47600, 47605                                                                                                                                                                                                                                 |
| General                   | Colorectal                 | 44139, 44140, 44141, 44143, 44144, 44145, 44146, 44147, 44150, 44151, 44155, 44157, 44158, 44160, 44204, 44205, 44206, 44207, 44208, 44210, 44211, 44212, 45110, 45111, 45112, 45113, 45114, 45119, 45123, 45395, 45397                                    |
| General                   | Esophagectomy              | 43107, 43108, 43112, 43113, 43116, 43117, 43118, 43121, 43123, 43124                                                                                                                                                                                       |
| General                   | Gastrectomy                | 43620, 43621, 43622, 43631, 43632, 43633, 43634                                                                                                                                                                                                            |
| General                   | Hepatectomy                | 47120, 47122, 47125, 47130                                                                                                                                                                                                                                 |
| General                   | Inguinal hernia            | 49505, 49507, 49520, 49650, 49651                                                                                                                                                                                                                          |
| General                   | Pancreatectomy             | 48140, 48145, 48146, 48150, 48152, 48153, 48154, 48155                                                                                                                                                                                                     |
| Gynecologic               | Hysterectomy or myomectomy | 58140, 58150, 58152, 58180, 58200, 58210, 58260, 58262, 58263, 58267, 58270, 58275, 58280, 58285, 58290, 58291, 58292, 58293, 58294, 58541, 58542, 58543, 58544, 58548, 58550, 58552, 58553, 58554, 58570, 58571, 58572, 58573, 58951, 58953, 58954, 58956 |
| Orthopedic                | Amputation                 | 61304, 61312, 61313, 61314, 61315, 61320, 61322, 61343, 61500, 61510, 61512, 61518, 61519, 61520, 61521, 61526, 61548, 61697, 61700                                                                                                                        |

| <b>Surgical Specialty</b> | <b>Surgical Procedure</b>      | <b>CPT Codes</b>                                                                                                                                                                                                               |
|---------------------------|--------------------------------|--------------------------------------------------------------------------------------------------------------------------------------------------------------------------------------------------------------------------------|
| Orthopedic                | Amputation                     | 27590, 27592, 27594, 27596, 27598, 27880, 27881, 27882, 27886                                                                                                                                                                  |
| Orthopedic                | Arthroscopy                    | 29806, 29807, 29822, 29823, 29824, 29825, 29826, 29827, 29828, 29870, 29871, 29873, 29874, 29875, 29876, 29877, 29879, 29880, 29881, 29882, 29883, 29884, 29888, 29891, 29999                                                  |
| Orthopedic                | Fracture                       | 23615, 24515, 27236, 27244, 27245, 27488, 27506, 27514, 27535                                                                                                                                                                  |
| Orthopedic                | Hip replacement                | 27130, 27125, 27132, 27134, 27137, 27138                                                                                                                                                                                       |
| Orthopedic                | Knee replacement               | 27447, 27486, 27487                                                                                                                                                                                                            |
| Orthopedic                | Shoulder                       | 23470, 23472                                                                                                                                                                                                                   |
| Spine                     | Disc Herniation                | 22533, 22534, 22551, 22552, 22554, 22558, 22585, 22586, 22590, 22595, 22600, 22612, 22614, 22630, 22632, 22633, 22634, 22856, 63001, 63005, 63012, 63015, 63017, 63020, 63030, 63035, 63045, 63047, 63048, 63050, 63051        |
| Thoracic                  | Lung surgery                   | 32440, 32442, 32445, 32480, 32482, 32484, 32486, 32488, 32500, 32503, 32504                                                                                                                                                    |
| Urology                   | Adrenalectomy                  | 60540, 60545, 60650                                                                                                                                                                                                            |
| Urology                   | Cystectomy                     | 51575, 51590, 51595, 51596, 51597, 52000, 52001, 52204, 52287, 52310, 52341, 52354, 52005, 52224, 52234, 52235, 52332, 52344, 52351, 52240, 52353                                                                              |
| Urology                   | Kidney                         | 50220, 50225, 50230, 50234, 50240, 50543, 50544, 50545, 50546, 50548                                                                                                                                                           |
| Urology                   | Laser vaporization of prostate | 52648                                                                                                                                                                                                                          |
| Urology                   | Prostatectomy                  | 55810, 55812, 55815, 55840, 55842, 55845, 55866                                                                                                                                                                                |
| Urology                   | TURP                           | 52601, 52630                                                                                                                                                                                                                   |
| Vascular                  | Endarterectomy                 | 35301, 35390, 37215, 37216, 37217, 37218                                                                                                                                                                                       |
| Vascular                  | Endovascular aorta             | 34800, 34802, 34803, 34804, 34805                                                                                                                                                                                              |
| Vascular                  | Endovascular other             | 37220, 37221, 37224, 37226, 37228                                                                                                                                                                                              |
| Vascular                  | Open aortic                    | 33320, 33321, 33322, 33330, 33332, 33335, 33875, 33877, 34830, 34831, 34832, 35081, 35082, 35091, 35092, 35102, 35103, 35331, 35526, 35531, 35541, 35546, 35548, 35549, 35551, 35560, 35626, 35631, 35641, 35646, 35647, 35651 |
| Vascular                  | Other infra-inguinal bypass    | 35521, 35533, 35556, 35558, 35563, 35565, 35571, 35621, 35623, 35654, 35656, 35661, 35663, 35665, 35666, 35671, 35681, 35682, 35683                                                                                            |

CPT, Current Procedural Terminology

**eTable 3.** Clinical Classification Software<sup>1</sup> Categories for Minor Eye, Skin, and Vascular Procedures Subgroup Analysis

| Minor Procedure Subgroup | Clinical Classification Software |                                                                                                                                                         |
|--------------------------|----------------------------------|---------------------------------------------------------------------------------------------------------------------------------------------------------|
|                          | Category                         | Category Description                                                                                                                                    |
| Eye                      | 15, 16, 17, 20                   | Lens and cataract procedures; Repair of retinal tear, detachment; Destruction of lesion of retina and choroid; Other intraocular therapeutic procedures |
| Skin                     | 169, 172                         | Debridement of wound, infection or burn; Skin graft                                                                                                     |
| Vascular Access          | 57                               | Creation, revision and removal of arteriovenous fistula or vessel-to-vessel cannula for dialysis                                                        |

**eTable 4.** Supplemental Patient Characteristics by Days Between Last Hemodialysis and Procedure

| Characteristic <sup>a</sup>                 | Days Between Last Hemodialysis and Procedure |                                            |                                            |
|---------------------------------------------|----------------------------------------------|--------------------------------------------|--------------------------------------------|
|                                             | 1 Day<br>(N = 750,163)                       | 2 Days<br>(N = 285,939)                    | 3 Days<br>(N = 111,744)                    |
| <b>Patient Characteristics</b>              |                                              |                                            |                                            |
| Listed for kidney transplant                | 30,534 (4.1%)                                | 14,240 (5.0%)                              | 5,670 (5.1%)                               |
| Years on hemodialysis at time of procedure  | 3.3 (1.6-5.8)<br>[n=750,163]                 | 3.2 (1.6-5.6)<br>[n=>285,900] <sup>b</sup> | 3.3 (1.7-5.8)<br>[n=>111,700] <sup>b</sup> |
| Prior procedure within 30 days              | 161,588 (21.5%)                              | 69,827 (24.4%)                             | 28,936 (25.9%)                             |
| Medicare/Medicaid dual eligible             | 346,124 (46.1%)                              | 134,487 (47.0%)                            | 52,814 (47.3%)                             |
| <b>Charlson comorbidities<sup>c</sup></b>   |                                              |                                            |                                            |
| Diabetes without complications              | 462,802 (61.7%)                              | 180,200 (63.0%)                            | 71,923 (64.4%)                             |
| Diabetes with complications                 | 436,218 (58.1%)                              | 170,929 (59.8%)                            | 68,356 (61.2%)                             |
| Peripheral vascular disease                 | 414,007 (55.2%)                              | 161,362 (56.4%)                            | 64,635 (57.8%)                             |
| Congestive heart failure                    | 411,281 (54.8%)                              | 158,471 (55.4%)                            | 63,051 (56.4%)                             |
| Chronic pulmonary disease                   | 319,961 (42.7%)                              | 122,857 (43.0%)                            | 48,634 (43.5%)                             |
| Cerebrovascular disease                     | 299,411 (39.9%)                              | 115,330 (40.3%)                            | 46,103 (41.3%)                             |
| Myocardial infarction                       | 212,347 (28.3%)                              | 83,015 (29.0%)                             | 33,302 (29.8%)                             |
| Mild liver disease                          | 199,537 (26.6%)                              | 77,779 (27.2%)                             | 30,544 (27.3%)                             |
| Cancer                                      | 113,226 (15.1%)                              | 42,841 (15.0%)                             | 16,472 (14.7%)                             |
| Dementia                                    | 51,592 (6.9%)                                | 20,979 (7.3%)                              | 8,369 (7.5%)                               |
| Peptic ulcer disease                        | 73,156 (9.8%)                                | 28,332 (9.9%)                              | 11,673 (10.4%)                             |
| Connective tissue disease-rheumatic disease | 52,085 (6.9%)                                | 19,625 (6.9%)                              | 7,837 (7.0%)                               |
| Paraplegia and hemiplegia                   | 48,816 (6.5%)                                | 19,446 (6.8%)                              | 8,129 (7.3%)                               |
| Moderate or severe liver disease            | 25,427 (3.4%)                                | 10,026 (3.5%)                              | 3,905 (3.5%)                               |
| Metastatic carcinoma                        | 20,424 (2.7%)                                | 7,793 (2.7%)                               | 2,975 (2.7%)                               |
| AIDS/HIV                                    | 12,330 (1.6%)                                | 4,844 (1.7%)                               | 1,983 (1.8%)                               |

<sup>a</sup> All listed characteristics were used for risk-adjustment in multivariable models. Data are presented as n (%) or median (IQR).

<sup>b</sup> Individual cell counts modified or omitted in order to preserve patient privacy.

<sup>c</sup> Charlson comorbidities were determined using published coding algorithms.<sup>2</sup> Kidney disease was not included as the study cohort only consisted of patients with ESKD. For calculation of the Charlson Comorbidity Index, all patients were considered to have kidney disease.

Abbreviations: AIDS, acquired immunodeficiency syndrome; HIV, human immunodeficiency virus.

**eTable 5. Common Clinical Classification Software<sup>1</sup> Procedure Categories**

| <b>Procedure Category</b>                                                                        | <b>N (%)</b>    |
|--------------------------------------------------------------------------------------------------|-----------------|
| Other intraocular therapeutic procedures <sup>a</sup>                                            | 224,784 (19.6%) |
| Creation, revision and removal of arteriovenous fistula or vessel-to-vessel cannula for dialysis | 218,179 (19.0%) |
| Other OR procedures on vessels other than head and neck <sup>b</sup>                             | 145,635 (12.7%) |
| Lens and cataract procedures                                                                     | 122,293 (10.7%) |
| Debridement of wound, infection or burn                                                          | 98,690 (8.6%)   |
| Skin graft                                                                                       | 64,238 (5.6%)   |
| Destruction of lesion of retina and choroid                                                      | 28,284 (2.5%)   |
| Repair of retinal tear, detachment                                                               | 17,720 (1.5%)   |
| Kidney transplant                                                                                | 16,392 (1.4%)   |
| Excision of skin lesion                                                                          | 14,515 (1.3%)   |
| Glaucoma procedures                                                                              | 14,335 (1.3%)   |
| Other therapeutic procedures on eyelids, conjunctiva, cornea                                     | 14,303 (1.2%)   |
| Amputation of lower extremity                                                                    | 13,324 (1.2%)   |
| Laparoscopy                                                                                      | 12,347 (1.1%)   |
| Insertion, revision, replacement, removal of cardiac pacemaker or cardioverter/defibrillator     | 11,499 (1.0%)   |

<sup>a</sup> The most common procedure codes in this category included intraocular drug injections and fluid removal.

<sup>b</sup> The most common procedure codes in this category included open or percutaneous stent placements, ligation and open thrombectomy of arteriovenous fistula, and open or percutaneous tibial and femoral revascularization procedures.

**eTable 6.** Patient and Procedure Characteristics, by Presence of an Additional Hemodialysis Session on the Day of Procedure

| Characteristic                                                      | No Additional Hemodialysis (n= 954,569) | Additional Hemodialysis (n= 193,277) |
|---------------------------------------------------------------------|-----------------------------------------|--------------------------------------|
| Dialysis-to-procedure interval                                      |                                         |                                      |
| 1 day                                                               | 746,840 (78.2%)                         | 3,323 (1.7%)                         |
| 2 days                                                              | 170,350 (17.8%)                         | 115,589 (59.8%)                      |
| 3 days                                                              | 37,379 (3.9%)                           | 74,365 (38.5%)                       |
| <b>Patient Characteristics</b>                                      |                                         |                                      |
| Age                                                                 | 65.0 (56.0-73.0)                        | 65.0 (56.0-73.0)                     |
| 18-39                                                               | 38,635 (4.0%)                           | 6,993 (3.6%)                         |
| 40-59                                                               | 295,551 (31.0%)                         | 63,815 (33.0%)                       |
| 60-79                                                               | 504,446 (52.8%)                         | 101,314 (52.4%)                      |
| 80+                                                                 | 115,937 (12.1%)                         | 21,155 (10.9%)                       |
| Sex                                                                 |                                         |                                      |
| Male                                                                | 538,914 (56.5%)                         | 113,806 (58.9%)                      |
| Female                                                              | 415,655 (43.5%)                         | 79,471 (41.1%)                       |
| Race <sup>a</sup>                                                   |                                         |                                      |
| White                                                               | 574,660 (60.2%)                         | 124,274 (64.3%)                      |
| Black/African American                                              | 324,319 (34.0%)                         | 57,446 (29.7%)                       |
| American Indian or Alaska Native                                    | 12,389 (1.3%)                           | 2,453 (1.3%)                         |
| Asian                                                               | 31,149 (3.3%)                           | 6,672 (3.5%)                         |
| Native Hawaiian or Pacific Islander                                 | 10,596 (1.1%)                           | 2,122 (1.1%)                         |
| Other or Multiracial                                                | 1,456 (0.2%)                            | 310 (0.2%)                           |
| Hispanic <sup>a</sup>                                               | 174,276 (18.3%)                         | 39,969 (20.7%)                       |
| Procedure day of the week                                           |                                         |                                      |
| Monday                                                              | 129,325 (13.5%)                         | 48,482 (25.1%)                       |
| Tuesday                                                             | 270,705 (28.4%)                         | 27,039 (14.0%)                       |
| Wednesday                                                           | 164,251 (17.2%)                         | 53,641 (27.8%)                       |
| Thursday                                                            | 260,950 (27.3%)                         | 26,149 (13.5%)                       |
| Friday                                                              | 129,338 (13.5%)                         | 37,966 (19.6%)                       |
| Cause of ESKD                                                       |                                         |                                      |
| Diabetes                                                            | 558,893 (58.6%)                         | 124,372 (64.4%)                      |
| Hypertension                                                        | 238,038 (25.0%)                         | 41,357 (21.4%)                       |
| Glomerulonephritis                                                  | 60,421 (6.3%)                           | 10,108 (5.2%)                        |
| Cystic kidney                                                       | 15,496 (1.6%)                           | 2,495 (1.3%)                         |
| Other urologic                                                      | 10,883 (1.1%)                           | 2,165 (1.1%)                         |
| Other/unknown                                                       | 69,493 (7.3%)                           | 12,535 (6.5%)                        |
| Vascular access type <sup>a</sup>                                   |                                         |                                      |
| Catheter                                                            | 299,568 (31.5%)                         | 46,014 (23.8%)                       |
| Graft                                                               | 156,169 (16.4%)                         | 33,465 (17.3%)                       |
| Fistula                                                             | 496,035 (52.1%)                         | 113,797 (58.9%)                      |
| Median household income for patient zip code (dollars) <sup>a</sup> |                                         |                                      |
| 0 to 45,999                                                         | 296,222 (31.4%)                         | 52,952 (27.8%)                       |
| 46,000 to 58,999                                                    | 268,437 (28.5%)                         | 54,034 (28.3%)                       |
| 59,000 to 78,999                                                    | 213,254 (22.6%)                         | 45,872 (24.0%)                       |
| 79,000+                                                             | 165,211 (17.5%)                         | 37,911 (19.9%)                       |



| <b>Characteristic</b>                                   | <b>No Additional Hemodialysis<br/>(n= 954,569)</b> | <b>Additional Hemodialysis<br/>(n= 193,277)</b> |
|---------------------------------------------------------|----------------------------------------------------|-------------------------------------------------|
| Dialysis schedule                                       |                                                    |                                                 |
| MWF                                                     | 578,366 (60.6%)                                    | 139,592 (72.2%)                                 |
| TThS                                                    | 376,203 (39.4%)                                    | 53,685 (27.8%)                                  |
| Dialysis on the day of the procedure                    | 0 (0.0%)                                           | 193,277 (100.0%)                                |
| Listed for kidney transplant                            | 41,001 (4.3%)                                      | 9,443 (4.9%)                                    |
| Years on hemodialysis at time of procedure <sup>a</sup> | 3.3 (1.6-5.8)                                      | 3.3 (1.7-5.6)                                   |
| Medicare/Medicaid dual eligible                         | 445,507 (46.7%)                                    | 87,918 (45.5%)                                  |
|                                                         |                                                    |                                                 |
| Myocardial infarction                                   | 271,240 (28.4%)                                    | 57,424 (29.7%)                                  |
| Congestive heart failure                                | 524,574 (55.0%)                                    | 108,229 (56.0%)                                 |
| Peripheral vascular disease                             | 528,200 (55.3%)                                    | 111,804 (57.8%)                                 |
| Cerebrovascular disease                                 | 381,932 (40.0%)                                    | 78,912 (40.8%)                                  |
| Dementia                                                | 66,899 (7.0%)                                      | 14,041 (7.3%)                                   |
| Chronic pulmonary disease                               | 408,913 (42.8%)                                    | 82,539 (42.7%)                                  |
| Connective tissue disease-rheumatic disease             | 66,493 (7.0%)                                      | 13,054 (6.8%)                                   |
| Peptic ulcer disease                                    | 93,488 (9.8%)                                      | 19,673 (10.2%)                                  |
| Mild liver disease                                      | 255,720 (26.8%)                                    | 52,140 (27.0%)                                  |
| Diabetes without complications                          | 589,580 (61.8%)                                    | 125,345 (64.9%)                                 |
| Diabetes with complications                             | 555,244 (58.2%)                                    | 120,259 (62.2%)                                 |
| Paraplegia and hemiplegia                               | 62,526 (6.6%)                                      | 13,865 (7.2%)                                   |
| Cancer                                                  | 144,335 (15.1%)                                    | 28,204 (14.6%)                                  |
| Moderate or severe liver disease                        | 32,734 (3.4%)                                      | 6,624 (3.4%)                                    |
| Metastatic carcinoma                                    | 26,142 (2.7%)                                      | 5,050 (2.6%)                                    |
| AIDS/HIV                                                | 16,042 (1.7%)                                      | 3,115 (1.6%)                                    |
| Charlson Comorbidity Index                              | 8.0 (2.0-10.0)                                     | 8.0 (2.0-10.0)                                  |
| <b>Procedure Characteristics</b>                        |                                                    |                                                 |
| RVU                                                     | 8.5 (2.7-12.0)                                     | 3.4 (1.4-8.5)                                   |
| Procedure organ system                                  |                                                    |                                                 |
| Cardiovascular                                          | 357,747 (37.5%)                                    | 37,622 (19.5%)                                  |
| ENT and dental                                          | 2,392 (0.3%)                                       | 341 (0.2%)                                      |
| Endocrine                                               | 7,578 (0.8%)                                       | 377 (0.2%)                                      |
| Eye                                                     | 335,971 (35.2%)                                    | 89,496 (46.3%)                                  |
| Gastrointestinal and abdominal                          | 39,911 (4.2%)                                      | 3,316 (1.7%)                                    |
| Hematologic                                             | 799 (0.1%)                                         | 118 (0.1%)                                      |
| Nervous system                                          | 7,696 (0.8%)                                       | 1,339 (0.7%)                                    |
| Obstetric and gynecologic                               | 1,799 (0.2%)                                       | 161 (0.1%)                                      |
| Orthopedic                                              | 42,159 (4.4%)                                      | 7,521 (3.9%)                                    |
| Skin and breast                                         | 134,908 (14.1%)                                    | 49,567 (25.6%)                                  |
| Thoracic                                                | 1,529 (0.2%)                                       | 99 (0.1%)                                       |
| Urologic                                                | 22,080 (2.3%)                                      | 3,320 (1.7%)                                    |
| <b>Facility Characteristics</b>                         |                                                    |                                                 |
| Procedure facility type                                 |                                                    |                                                 |
| Office                                                  | 315,731 (33.1%)                                    | 87,700 (45.4%)                                  |
| Home                                                    | 2,243 (0.2%)                                       | 1,169 (0.6%)                                    |
| Inpatient Hospital                                      | 93,391 (9.8%)                                      | 8,777 (4.5%)                                    |
| Outpatient Hospital                                     | 431,207 (45.2%)                                    | 62,806 (32.5%)                                  |
| Ambulatory Surgery Center                               | 90,432 (9.5%)                                      | 20,965 (10.8%)                                  |

| <b>Characteristic</b>      | <b>No Additional Hemodialysis<br/>(n= 954,569)</b> | <b>Additional Hemodialysis<br/>(n= 193,277)</b> |
|----------------------------|----------------------------------------------------|-------------------------------------------------|
| Skilled Nursing Facility   | 15,038 (1.6%)                                      | 10,009 (5.2%)                                   |
| Other                      | 6,527 (0.7%)                                       | 1,851 (1.0%)                                    |
| <b>For-profit facility</b> | <b>833,206 (88.1%)</b>                             | <b>166,919 (87.2%)</b>                          |

Data are presented as n (%) or median (IQR).

<sup>a</sup> Missing data not shown.

**eTable 7.** Primary Outcome Model—Alternative Reference Levels for Same-Day Hemodialysis Subgroup Analysis

| Reference Level                                                               | Adjusted Hazard Ratio (95% CI) | P Value | P Value for Interaction |
|-------------------------------------------------------------------------------|--------------------------------|---------|-------------------------|
| <b>1-day dialysis-to-procedure interval, no same-day hemodialysis</b>         |                                |         |                         |
| 1-day dialysis-to-procedure interval                                          |                                |         |                         |
| No same-day hemodialysis                                                      | Reference                      |         |                         |
| Same-day hemodialysis                                                         | 1.18 (.98-1.42)                | 0.086   |                         |
| 2-day dialysis-to-procedure interval                                          |                                |         |                         |
| No same-day hemodialysis                                                      | 1.14 (1.10-1.18)               | < .001  | 0.004                   |
| Same-day hemodialysis                                                         | 1.01 (.97-1.05)                | 0.629   |                         |
| 3-day dialysis-to-procedure interval                                          |                                |         |                         |
| No same-day hemodialysis                                                      | 1.28 (1.21-1.35)               | < .001  | 0.001                   |
| Same-day hemodialysis                                                         | 1.07 (1.01-1.12)               | 0.017   |                         |
| <b>1-day dialysis-to-procedure interval with or without same-day dialysis</b> |                                |         |                         |
| 1-day dialysis-to-procedure interval                                          |                                |         |                         |
| No same-day hemodialysis                                                      | Reference                      |         |                         |
| Same-day hemodialysis                                                         | Reference                      |         |                         |
| 2-day dialysis-to-procedure interval                                          |                                |         |                         |
| No same-day hemodialysis <sup>a</sup>                                         | 1.14 (1.10-1.18)               | < .001  | 0.004                   |
| Same-day hemodialysis <sup>b</sup>                                            | 0.86 (.71-1.04)                | 0.113   |                         |
| 3-day dialysis-to-procedure interval                                          |                                |         |                         |
| No same-day hemodialysis <sup>a</sup>                                         | 1.28 (1.21-1.35)               | < .001  | 0.001                   |
| Same-day hemodialysis <sup>b</sup>                                            | 0.90 (.74-1.10)                | 0.308   |                         |

<sup>a</sup> Reference is a 1-day procedure-to-dialysis interval without same-day hemodialysis.

<sup>b</sup> Reference is a 1-day procedure-to-dialysis interval with same-day hemodialysis.

HR, hazard ratio; CI, confidence interval

**eTable 8.** Post Hoc Secondary Outcome and Subdistribution Hazard Models<sup>a</sup>

|                                                              | Days Between Last Hemodialysis and Procedure |         |                       |         |
|--------------------------------------------------------------|----------------------------------------------|---------|-----------------------|---------|
|                                                              | 2 days (versus 1 day)                        |         | 3 days (versus 1 day) |         |
|                                                              | HR (95% CI)                                  | P value | HR (95% CI)           | P value |
| <b>Post Hoc Secondary Outcomes</b>                           |                                              |         |                       |         |
| 90-day mortality due to stroke                               | 0.89 (0.69-1.15)                             | 0.364   | 1.17 (0.83-1.63)      | 0.375   |
| 90-day mortality due to sepsis                               | 1.12 (0.98-1.27)                             | 0.099   | 1.13 (0.94-1.36)      | 0.196   |
| 90-day mortality due to other infectious causes <sup>b</sup> | 1.05 (0.83-1.33)                             | 0.677   | 1.12 (0.79-1.58)      | 0.528   |
| 90-day mortality due to withdrawal of care                   | 1.26 (1.14-1.39)                             | < .001  | 1.42 (1.23-1.64)      | < .001  |
| 90-day readmissions due to infectious causes                 | 1.01 (0.98-1.04)                             | 0.53    | 0.99 (0.95-1.03)      | 0.559   |
| <b>Subdistribution hazard models<sup>c</sup></b>             |                                              |         |                       |         |
| 90-day cardiovascular mortality                              | 1.07 (1.01-1.13)                             | 0.015   | 1.14 (1.06-1.23)      | 0.001   |
| 90-day re-admissions                                         | 1.08 (1.06-1.09)                             | < .001  | 1.13 (1.11-1.15)      | < .001  |
| 90-day cardiovascular re-admissions                          | 1.00 (0.98-1.03)                             | 0.691   | 0.98 (0.95-1.02)      | 0.31    |

<sup>a</sup> All models include full sample (N = 1,147,846).

<sup>b</sup> Other infectious causes include infections without evidence of sepsis such as peritonitis, central nervous system infections, endocarditis, hepatitis, pneumonia, pyelonephritis, and urinary tract infections.

<sup>c</sup> Subdistribution hazard ratios are displayed.

HR, hazard ratio; CI, confidence interval.

**eTable 9.** Sensitivity Analyses—Association Between Days Between Last Hemodialysis and Procedure and 90-Day Postoperative Mortality

|                                                                                                | Days Between Last Hemodialysis and Procedure |         |                       |         |
|------------------------------------------------------------------------------------------------|----------------------------------------------|---------|-----------------------|---------|
|                                                                                                | 2 days (versus 1 day)                        |         | 3 days (versus 1 day) |         |
|                                                                                                | HR (95% CI)                                  | P value | HR (95% CI)           | P value |
| <b>Study population subgroups<sup>a</sup></b>                                                  |                                              |         |                       |         |
| Expanded population (weekend and prior ED/hospital visits included) <sup>b</sup>               | 1.18 (1.15-1.22)                             | < .001  | 1.31 (1.25-1.36)      | < .001  |
| Procedures without preoperative hemodialysis schedule changes <sup>c</sup>                     | 1.12 (1.08-1.17)                             | < .001  | 1.22 (1.14-1.30)      | < .001  |
| Procedures with preoperative hemodialysis schedule changes <sup>d</sup>                        | 1.22 (1.12-1.33)                             | < .001  | 1.23 (1.12-1.35)      | < .001  |
| First procedure per patient only, no censoring for subsequent procedures <sup>e</sup>          | 1.16 (1.10-1.23)                             | < .001  | 1.24 (1.15-1.35)      | < .001  |
| Outpatient facility, no same-day hemodialysis <sup>f</sup>                                     | 1.17 (1.11-1.23)                             | < .001  | 1.34 (1.25-1.43)      | < .001  |
| Inpatient facility <sup>g</sup>                                                                | 1.16 (1.09-1.24)                             | < .001  | 1.20 (1.10-1.32)      | < .001  |
| Inpatient facility, same-day dialysis subgroup analysis <sup>h</sup>                           |                                              |         |                       |         |
| With same-day dialysis                                                                         | 1.04 (0.95-1.13)                             | 0.375   | 1.04 (0.95-1.13)      | 0.763   |
| Without same-day dialysis                                                                      | 1.15 (1.07-1.24)                             | < .001  | 1.24 (1.13-1.37)      | < .001  |
| Monday-Wednesday-Friday patients <sup>i</sup>                                                  | 1.18 (1.10-1.26)                             | < .001  | 1.30 (1.19-1.42)      | < .001  |
| Tuesday-Thursday-Saturday patients <sup>j</sup>                                                | 1.28 (1.15-1.42)                             | < .001  | 1.27 (1.16-1.40)      | < .001  |
| <b>Procedural risk adjustment</b>                                                              |                                              |         |                       |         |
| High-volume proceduralists, random effect for proceduralist <sup>a,k</sup>                     | 1.17 (1.06-1.28)                             | 0.001   | 1.26 (1.11-1.44)      | 0.001   |
| Full sample, adjusted for individual CCS categories <sup>l</sup>                               | 1.11 (1.07-1.15)                             | < .001  | 1.18 (1.12-1.24)      | < .001  |
| Common surgical procedures subgroup, adjusted for individual surgical procedure <sup>a,m</sup> | 1.19 (1.09-1.30)                             | < .001  | 1.20 (1.05-1.38)      | 0.007   |
| <b>Follow-up period</b>                                                                        |                                              |         |                       |         |
| 1 day                                                                                          | 1.67 (1.33-2.10)                             | < .001  | 2.02 (1.51-2.70)      | < .001  |
| 7 days                                                                                         | 1.31 (1.17-1.45)                             | < .001  | 1.57 (1.36-1.82)      | < .001  |
| 14 days                                                                                        | 1.25 (1.16-1.36)                             | < .001  | 1.47 (1.32-1.65)      | < .001  |
| 30 days                                                                                        | 1.21 (1.15-1.29)                             | < .001  | 1.42 (1.31-1.54)      | < .001  |
| 60 days                                                                                        | 1.18 (1.13-1.23)                             | < .001  | 1.27 (1.19-1.35)      | < .001  |
| 90 days (primary model)                                                                        | 1.14 (1.10-1.18)                             | < .001  | 1.25 (1.18-1.30)      | < .001  |
| 180 days                                                                                       | 1.14 (1.11-1.17)                             | < .001  | 1.22 (1.17-1.26)      | < .001  |
| 365 days                                                                                       | 1.12 (1.10-1.14)                             | < .001  | 1.18 (1.15-1.22)      | < .001  |
| <b>Alternative model specifications</b>                                                        |                                              |         |                       |         |
| Primary model, hemodialysis schedule variable removed                                          | 1.14 (1.10-1.18)                             | < .001  | 1.25 (1.19-1.31)      | < .001  |
| Primary model, procedure day of the week variable removed                                      | 1.09 (1.06-1.12)                             | < .001  | 1.17 (1.12-1.22)      | < .001  |

|                                                 | Days Between Last Hemodialysis and Procedure |         |                       |         |
|-------------------------------------------------|----------------------------------------------|---------|-----------------------|---------|
|                                                 | 2 days (versus 1 day)                        |         | 3 days (versus 1 day) |         |
|                                                 | HR (95% CI)                                  | P value | HR (95% CI)           | P value |
| <u>Propensity score overlap-weighted models</u> |                                              |         |                       |         |
| <i>Multinomial logistic regression</i>          |                                              |         |                       |         |
| Including all primary model covariates          | 1.09 (0.99-1.21)                             | 0.073   | 1.22 (1.12-1.32)      | < .001  |
| Excluding same-day hemodialysis as a covariate  | 1.16 (1.08-1.24)                             | 0.006   | 1.25 (1.16-1.35)      | < .001  |
| Including interaction terms <sup>n</sup>        | 1.09 (0.98-1.20)                             | 0.125   | 1.26 (1.13-1.40)      | < .001  |
| <i>Random forest</i>                            |                                              |         |                       |         |
| Including all model covariates                  | 1.10 (1.03-1.17)                             | 0.005   | 1.18 (1.09-1.27)      | < .001  |
| Excluding same-day hemodialysis as a covariate  | 1.14 (1.07-1.20)                             | < .001  | 1.21 (1.12-1.30)      | < .001  |

<sup>a</sup> Models presented here are restrictive subgroup analyses, in which the primary model specification was run on either an expanded or restricted study population without a specific test for interaction. The size of the study population is noted in a footnote for each model.

<sup>b</sup> n = 1,248,849.

<sup>c</sup> n = 1,002,173.

<sup>d</sup> n = 145,673.

<sup>e</sup> n = 346,828.

<sup>f</sup> n = 837,370.

<sup>g</sup> n = 139,005.

<sup>h</sup> n = 139,005. The study population was restricted to inpatient procedures and then the model specification for “Examining Heterogeneity by Same Day Dialysis” as described in eMethods was used.

<sup>i</sup> n = 717,958.

<sup>j</sup> n = 429,888.

<sup>k</sup> n = 201,090.

<sup>l</sup> n = 1,147,846 (primary study population).

<sup>m</sup> n = 76,992. See eTable 2 for the list of procedures.

<sup>n</sup> The model to estimate the propensity score contained multiplicative interaction terms between day of the week, dialysis schedule, same-day hemodialysis, and vascular access type.

HR, hazard ratio; CI, confidence interval; CCS, Clinical Classification Software.

**eTable 10.** Secondary Outcome Models—Alternative Reference Levels for Same-Day Hemodialysis Subgroup Analysis<sup>a</sup>

| Secondary Outcome                          | Adjusted Hazard Ratio (95% CI) | P Value | P Value for Interaction |
|--------------------------------------------|--------------------------------|---------|-------------------------|
| <b>90-day cardiovascular mortality</b>     |                                |         |                         |
| 1-day dialysis-to-procedure interval       | Reference                      |         |                         |
| 2-day dialysis-to-procedure interval       |                                |         |                         |
| No same-day hemodialysis                   | 1.08 (1.01-1.14)               | 0.015   | 0.003                   |
| Same-day hemodialysis                      | 0.95 (0.89-1.01)               | 0.127   |                         |
| 3-day dialysis-to-procedure interval       |                                |         |                         |
| No same-day hemodialysis                   | 1.14 (1.04-1.24)               | 0.003   | 0.049                   |
| Same-day hemodialysis                      | 1.03 (0.95-1.10)               | 0.499   |                         |
| <b>90-day re-admissions</b>                |                                |         |                         |
| 1-day dialysis-to-procedure interval       | Reference                      |         |                         |
| 2-day dialysis-to-procedure interval       |                                |         |                         |
| No same-day hemodialysis                   | 1.07 (1.06-1.09)               | < .001  | < .001                  |
| Same-day hemodialysis                      | 1.03 (1.01-1.05)               | 0.001   |                         |
| 3-day dialysis-to-procedure interval       |                                |         |                         |
| No same-day hemodialysis                   | 1.16 (1.14-1.19)               | < .001  | < .001                  |
| Same-day hemodialysis                      | 1.07 (1.04-1.09)               | < .001  |                         |
| <b>90-day cardiovascular re-admissions</b> |                                |         |                         |
| 1-day dialysis-to-procedure interval       | Reference                      |         |                         |
| 2-day dialysis-to-procedure interval       |                                |         |                         |
| No same-day hemodialysis                   | 1.01 (.98-1.04)                | 0.634   | 0.768                   |
| Same-day hemodialysis                      | 1.01 (.98-1.05)                | 0.443   |                         |
| 3-day dialysis-to-procedure interval       |                                |         |                         |
| No same-day hemodialysis                   | .99 (.95-1.04)                 | 0.757   | 0.839                   |
| Same-day hemodialysis                      | .99 (.95-1.03)                 | 0.577   |                         |

<sup>a</sup> Similar to the primary same-day hemodialysis subgroup analysis (Figure 4, eMethods), the one-day interval (with and without same-day dialysis) serves as a single reference category because fewer than 0.5% of patients on a one-day interval received same-day dialysis.

HR, hazard ratio; CI, confidence interval

## eMethods

### Identification of Outpatient Hemodialysis Claims

Outpatient hemodialysis claims were identified using Revenue Center Code 0821 in outpatient facility claims with a type of bill “72.”

### Covariates

The Quan modification of the Charlson comorbidities and comorbidity index were determined for all inpatient, outpatient, and physician/supplier claims that occurred prior to the surgical procedure to identify patients’ comorbidities at the time of the procedure.<sup>2</sup> The patient zip code (from the dialysis facility for the week or, if this was missing, from the CMS Medical Evidence Report Form) was cross-referenced with the United States Census Bureau American Community Survey 2018 Income Tables to estimate the median income for the zip code.<sup>3</sup>

### Secondary Outcomes

Cardiovascular mortality and readmission due to circulatory causes were both defined using algorithms used in the 2020 USRDS Annual Data Report. Cardiovascular mortality was defined using specific cause of death codes from the DEATH file within the USRDS. These death codes come from mandatory forms (CMS-2746: ESRD Death Notification) submitted to Medicare. Readmission due to circulatory causes was defined using the ICD-9 and ICD-10 diagnosis codes listed in the 2020 USRDS Data Annual Report.

### Model Specifications

#### Primary Model

For our primary analysis, we estimated a Cox proportional hazards model for mortality. Specifically, we estimated the following regression for procedure  $i$ :

$$h_i(t) = h_0(t) \cdot \exp \left( \sum_{d=2}^3 Interval_{d,i} \cdot \delta_d + SameDay_i \cdot \theta + X_i \cdot B \right)$$

Where the hazard rate for procedure  $i$  is  $h_i(t)$ , the baseline hazard rate  $h_0(t)$ ,  $Interval_{d,i}$  is an indicator variable for whether the dialysis-procedure interval was  $d$  days,  $SameDay_i$  is an indicator for whether the patient received a same-day dialysis session,  $X_i$  is a vector of confounders, and  $(\delta_d, \theta, B)$  is a vector of coefficients.

#### Examining Heterogeneity by Same-Day Dialysis

We next examined whether a dialysis session performed on the day of the procedure (“same-day dialysis”) was associated with lower risk of postoperative mortality in procedures with a 2- or 3-day dialysis-to-procedure interval. We did so by separating patients into five categories: (i) a 1-day interval (this was the reference category); (ii) a 2-day interval without same-day dialysis; (iii) a 2-day interval with same-day dialysis; (iv) a 3-day interval without same-day dialysis; and (v) a 3-day interval with same-day dialysis. We kept the 1-day interval (with and without same-day dialysis) as a single category because fewer than 0.5% of patients on a 1-day interval received same day dialysis. To examine whether same-day dialysis was associated with heterogeneity within the same 2- or 3-day interval, we compared (ii) to (iii) and (iv) to (v), which is analogous to an interaction subgroup analysis. More formally, we estimated the following regression:

$$h_i(t) = h_0(t) \cdot \exp \left( \sum_{d=2}^3 Interval_{d,i} \cdot \delta_d + \sum_{d=2}^3 Interval_{d,i} \cdot SameDay_i \cdot \theta_d + X_i \cdot B \right)$$

which is analogous to the primary model except we now incorporate an interaction term between the presence of same-day dialysis and a 2- or 3-day interval. Now the vector of estimated coefficients is  $(\delta_d, \theta_d, B)$ . We exclude an indicator variable for same-day dialysis because we combined the 1-day interval (with and without same-day dialysis) into a single reference group.

To estimate the hazard ratio of each subgroup, we take the linear combination of coefficients, using the delta method for standard errors. For instance, the hazard ratio of a 2-day interval with same-day dialysis (compared to the reference of a 1-day interval) is  $\exp(\delta_2 + \theta_2)$ . To examine whether there is heterogeneity by the presence of



same-day dialysis (e.g., whether mortality differed between patients with a 2-day interval *with* same-day dialysis versus *without* same-day dialysis), we examined the p-values on  $\theta_d$ .

In sensitivity analysis, we included a separate indicator variable for same-day dialysis in addition to the interaction term, which shifts the reference group to patients with a 1-day interval with and without same-day dialysis:

$$h_i(t) = h_0(t) \cdot \exp\left(\sum_{d=2}^3 \text{Interval}_{d,i} \cdot \delta_d + \text{SameDay}_i \cdot \theta_1 + \sum_{d=2}^3 \text{Interval}_{d,i} \cdot \text{SameDay}_i \cdot \theta_d + X_i \cdot B\right)$$

### Subgroup Analysis

We performed subgroup analyses by incorporating an interaction term for the subgroup of interest with the dialysis interval. Specifically, we estimated the following regression:

$$h_i(t) = h_0(t) \cdot \exp\left(\sum_{d=2}^3 \text{Interval}_{d,i} \cdot \delta_d + \text{Subgroup}_i \cdot \varphi_1 + \sum_{d=2}^3 \text{Interval}_{d,i} \cdot \text{Subgroup}_i \cdot \varphi_d + \text{SameDay}_i \cdot \theta + X_i \cdot B\right)$$

To estimate hazard ratios for a specific subgroup, we exponentiated the sum of the relevant coefficients (e.g., the estimate for a 2-day interval is  $\exp(\delta_2 + \varphi_2)$  and the p-value for interaction is the p-value on  $\varphi_2$ ).

We also performed several restrictive subgroup analyses in which the primary model specification was used on a different study population. These are noted and presented in eTable 9.

### Absolute Risk Calculations

We estimated the absolute risk difference of each outcome associated with a change in the dialysis-to-procedure interval. We did so by first estimating the baseline survivor function as a post-estimation procedure following the Cox model (in Stata, this is performed using the post-estimation command “predict” with the “basesurv” option). The post-estimation procedure operationalizes equation 4.34 from Kalbfleisch et al.<sup>4</sup> From here, we estimate the predicted probability of survival at 90 days for each patient under counterfactual scenarios, assuming the patient had a 1-, 2-, or 3-day intervals. For instance, the predicted survival for patient *i* assuming a 2-day interval is:

$$S_i(90|d = 2) = S_0(90)^{\exp(\delta_2 + \text{SameDay}_i \cdot \theta + X_i \cdot B)}$$

The mean difference across all patients is the absolute risk difference. To conduct statistical inference, we conducted a non-parametric bootstrap, where we sampled with replacement a total of 250 samples, with 50 from each multiply imputed dataset.

### Propensity Score Overlap-Weighted Models

We fitted an overlap-weighted Cox proportional hazards model for the primary outcome. Unlike inverse probability treatment weighting, overlap weighting assigns lower weights to outliers that can bias results.<sup>5</sup> A multinomial logistic regression was used to estimate the propensity score for number of days between last dialysis and procedure for each imputed dataset. Absolute standardized differences were computed for each covariate in the matched sample to assess balance; an absolute standardized difference < .10 was considered acceptable. A doubly robust method using a Cox proportional hazards model containing all primary model covariates and estimated propensity scores was then used to evaluate the association between the dialysis-to-procedure interval and postoperative mortality within each imputed dataset. Estimates were then combined using standard rules from Rubin.

Despite use of overlap-weighting, persistent or exaggerated imbalance was noted across several variables (eFigure 4). Based on examination of the underlying data, we hypothesized that multiple variables including procedure day of the week, additional same-day dialysis sessions, and hemodialysis schedule were related to each other and the dialysis-to-procedure interval in a nonlinear manner. Several exploratory models were used to estimate propensity scores for the dialysis-to-procedure interval: (a) a multinomial logistic regression with multiple interaction terms, (2) a probability forest grown using a random forest algorithm,<sup>6</sup> and (3) all propensity score

estimation models were re-fit without additional same-day hemodialysis as a predictor as this variable was felt to be endogenous to the prediction of the dialysis-to-procedure interval. For the random forest algorithm, the minimum node size was 10, unlimited tree depth was allowed, and the Gini index was used as the splitting rule for classification.

Absolute standardized mean differences for adjusted and unadjusted models are shown in eFigure 4. As a propensity score was estimated for a multcategory treatment variable (dialysis-to-procedure interval), the maximum absolute standardized mean difference across treatment levels was calculated for each model characteristic. Absolute standardized mean differences were calculated using the average of standard deviations across all treatment groups and imputed data sets.

Balance across most covariates improved with random forest propensity score models, although imbalance persisted for procedure day of the week, hemodialysis schedule, additional same-day dialysis, vascular access type, and procedure organ systems categories. All overlap-weighted proportional hazards models were doubly robust and contained these variables as covariates. All models showed consistent evidence of an association between a 3-day dialysis-to-procedure interval and increased hazard of 90-day mortality (eTable 9). Random forest models with better balance across all primary model covariates also showed evidence of an association between a 2-day dialysis-to-procedure interval and increased hazard of 90-day mortality.

**eFigure 1.** Directed Acyclic Graph of Hypothesized Relationships Between Key Model Variables

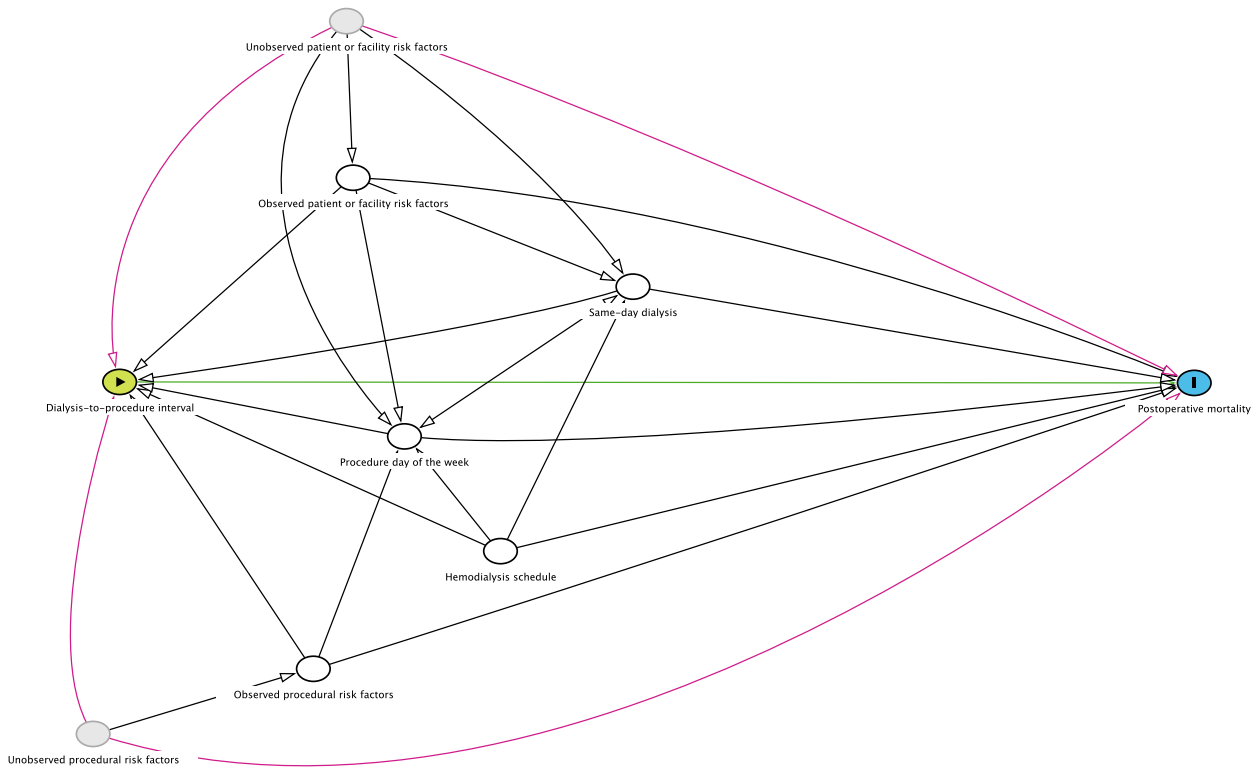

This directed acyclic graph depicts hypothesized relationships between key model variables. Groups of variables have been condensed into larger categories in order to facilitate readability. The green circle represents the primary exposure. The blue circle represents the primary outcome. White circles represent adjusted variables. Gray circles represent unobserved (ie, latent) variables. Black and green lines represent causal paths, and pink lines represent biasing paths. Observed patient or facility risk factors included: age, sex, race and ethnicity, cause of end-stage kidney disease, vascular access type, median household income for patient zip code, listed for kidney transplant, years on hemodialysis at time of procedure, prior procedure within 30 days, Medicare/Medicaid dual eligibility, Charlson comorbidities, facility type, and facility profit orientation. Observed procedural risk factors included: procedure relative value units and procedure organ system. Graph created using DAGitty software.<sup>7</sup>

**eFigure 2. Cumulative Incidence of 30-Day Postoperative Mortality<sup>a</sup>**

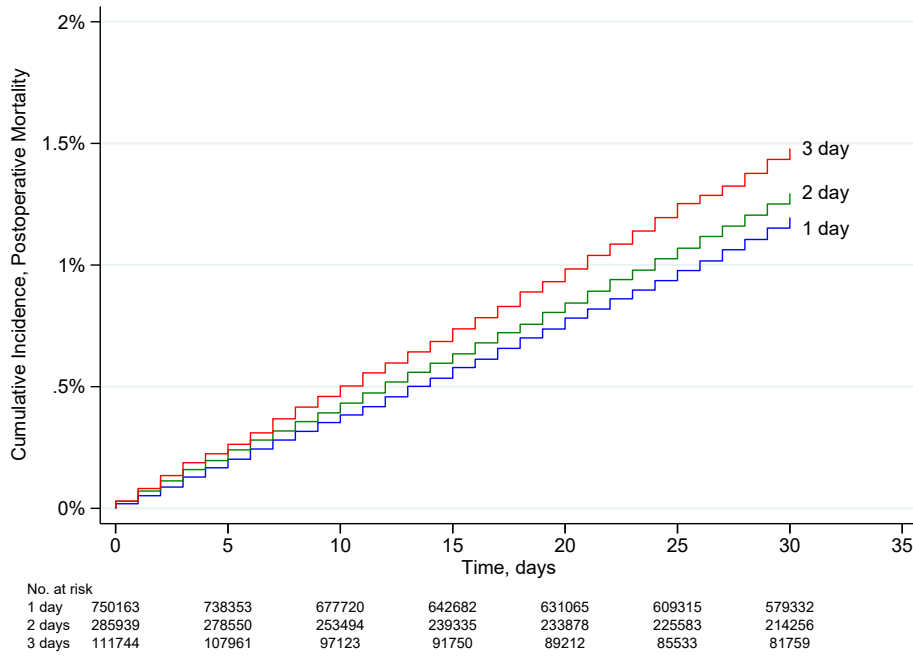

<sup>a</sup> Median follow up time was 30 days (interquartile range 30-30 days). Log rank for 1-day interval versus 2-day interval  $p < .001$ . Log rank for 1-day interval versus 3-day interval  $p < .001$ . Log rank for 2-day interval versus 3-day interval  $p < .001$ .

**eFigure 3.** Ninety-Day Postoperative Mortality With and Without an Additional Same-Day Dialysis Session for Patients with 1 Day Between Last Hemodialysis and Surgery<sup>a</sup>

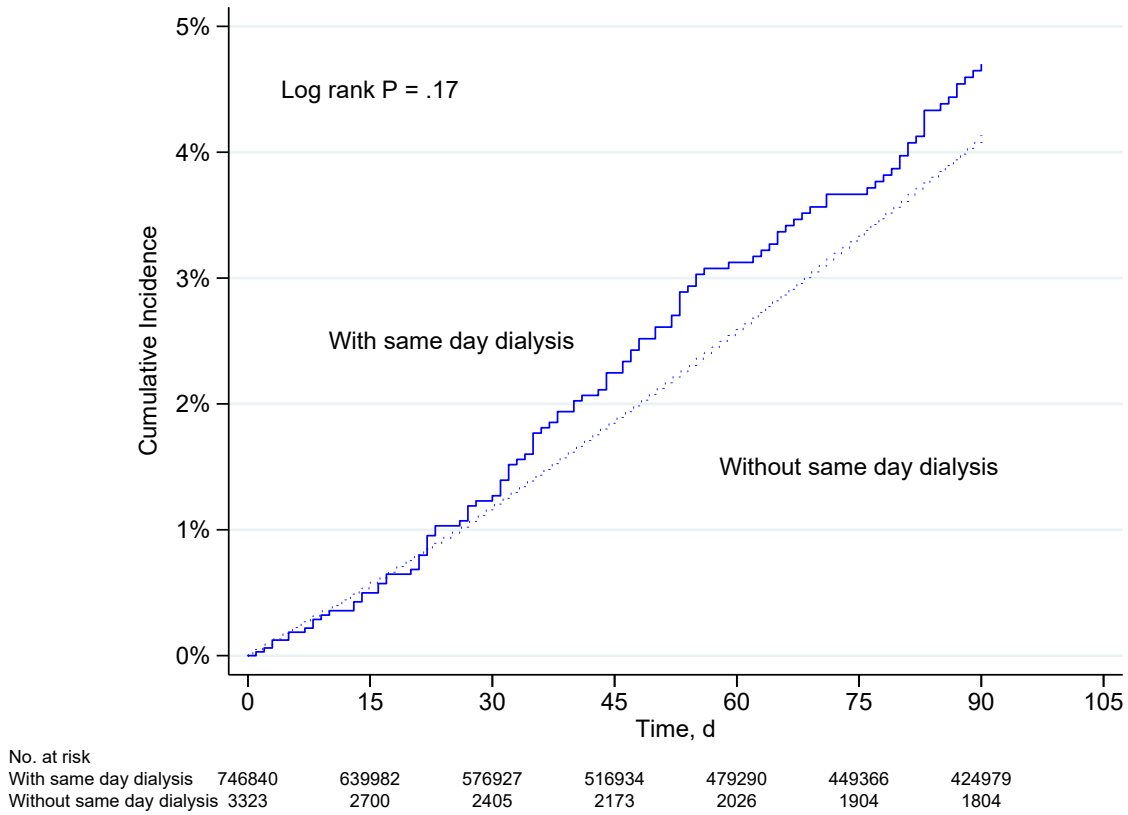

<sup>a</sup> See eTable 7 for a multivariable model evaluating the association between same-day hemodialysis and postoperative mortality for procedures preceded by a 1-day dialysis-to-procedure interval. Median follow up time was 90 days (interquartile range 35-90 days).

## eFigure 4. Love Plots for Unadjusted and Overlap-Weighted Models

### A. Love Plot Comparing Multinomial Logistic Propensity Score Models With and Without Interaction Terms<sup>a</sup>

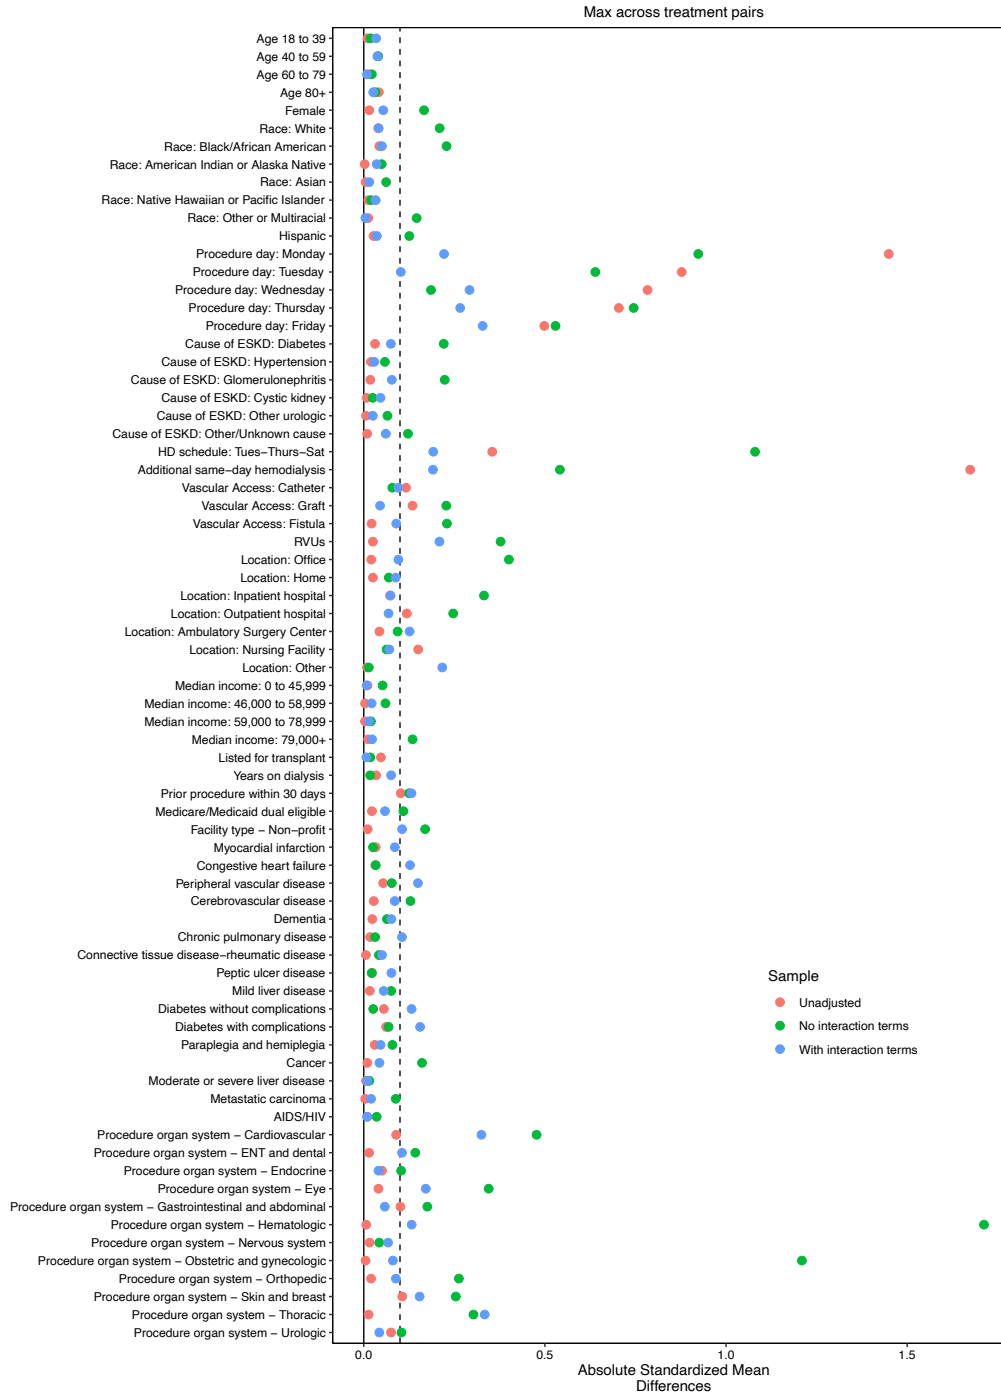

<sup>a</sup> The interaction term model to estimate the propensity score contained multiplicative interaction terms between day of the week, dialysis schedule, same-day hemodialysis, and vascular access type.

## B. Love Plot Comparing Multinomial Logistic Propensity Score Models With and Without Same-Day Hemodialysis as a Propensity Score Model Covariate

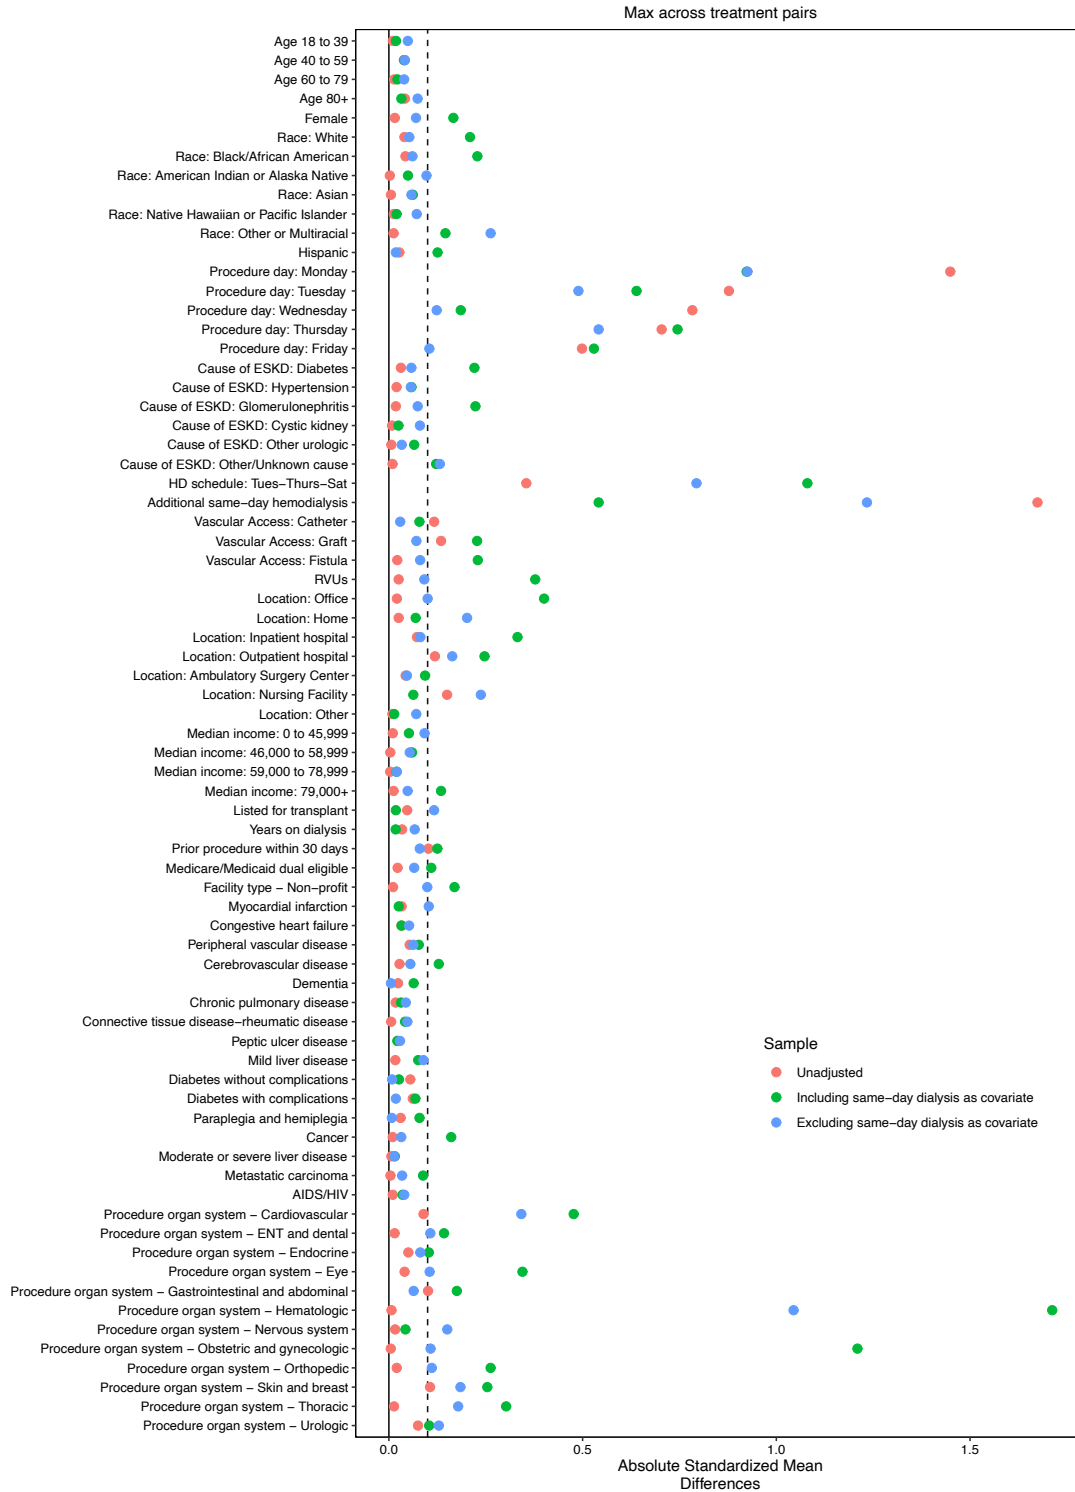

### C. Love Plot Comparing Multinomial Logistic and Random Forest Propensity Score Models

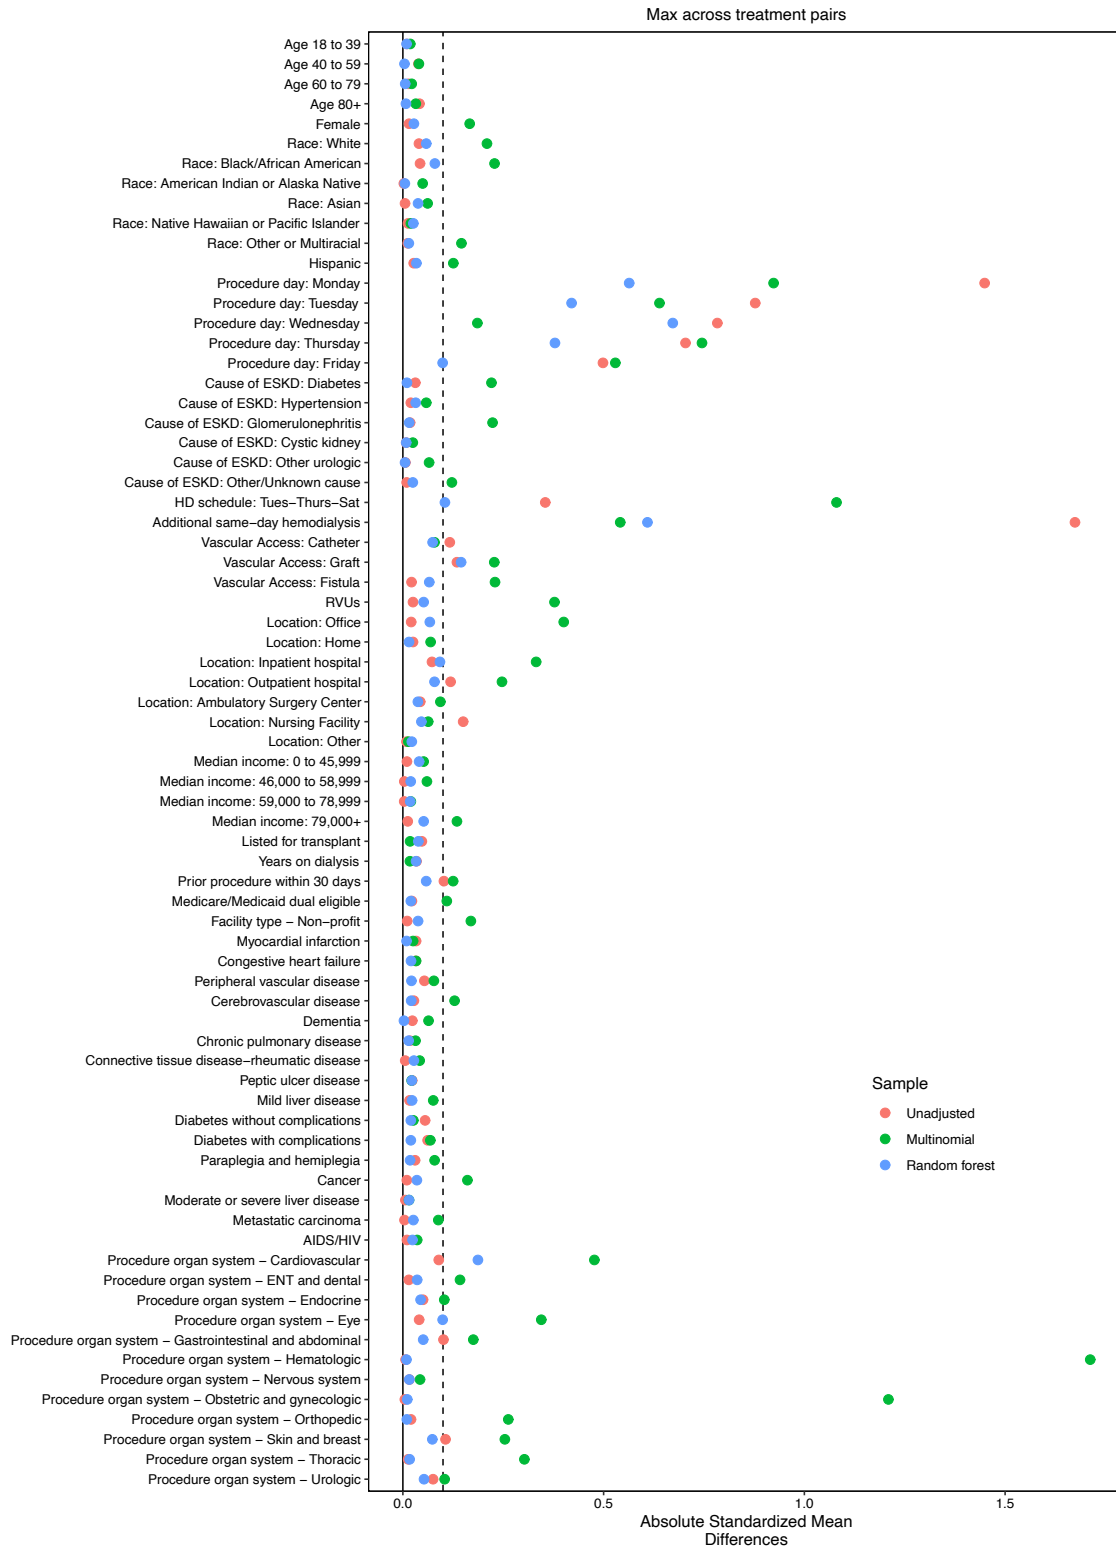



### D. Love Plot Comparing Random Forest Propensity Score Models With and Without Same-Day Hemodialysis as a Propensity Score Model Covariate

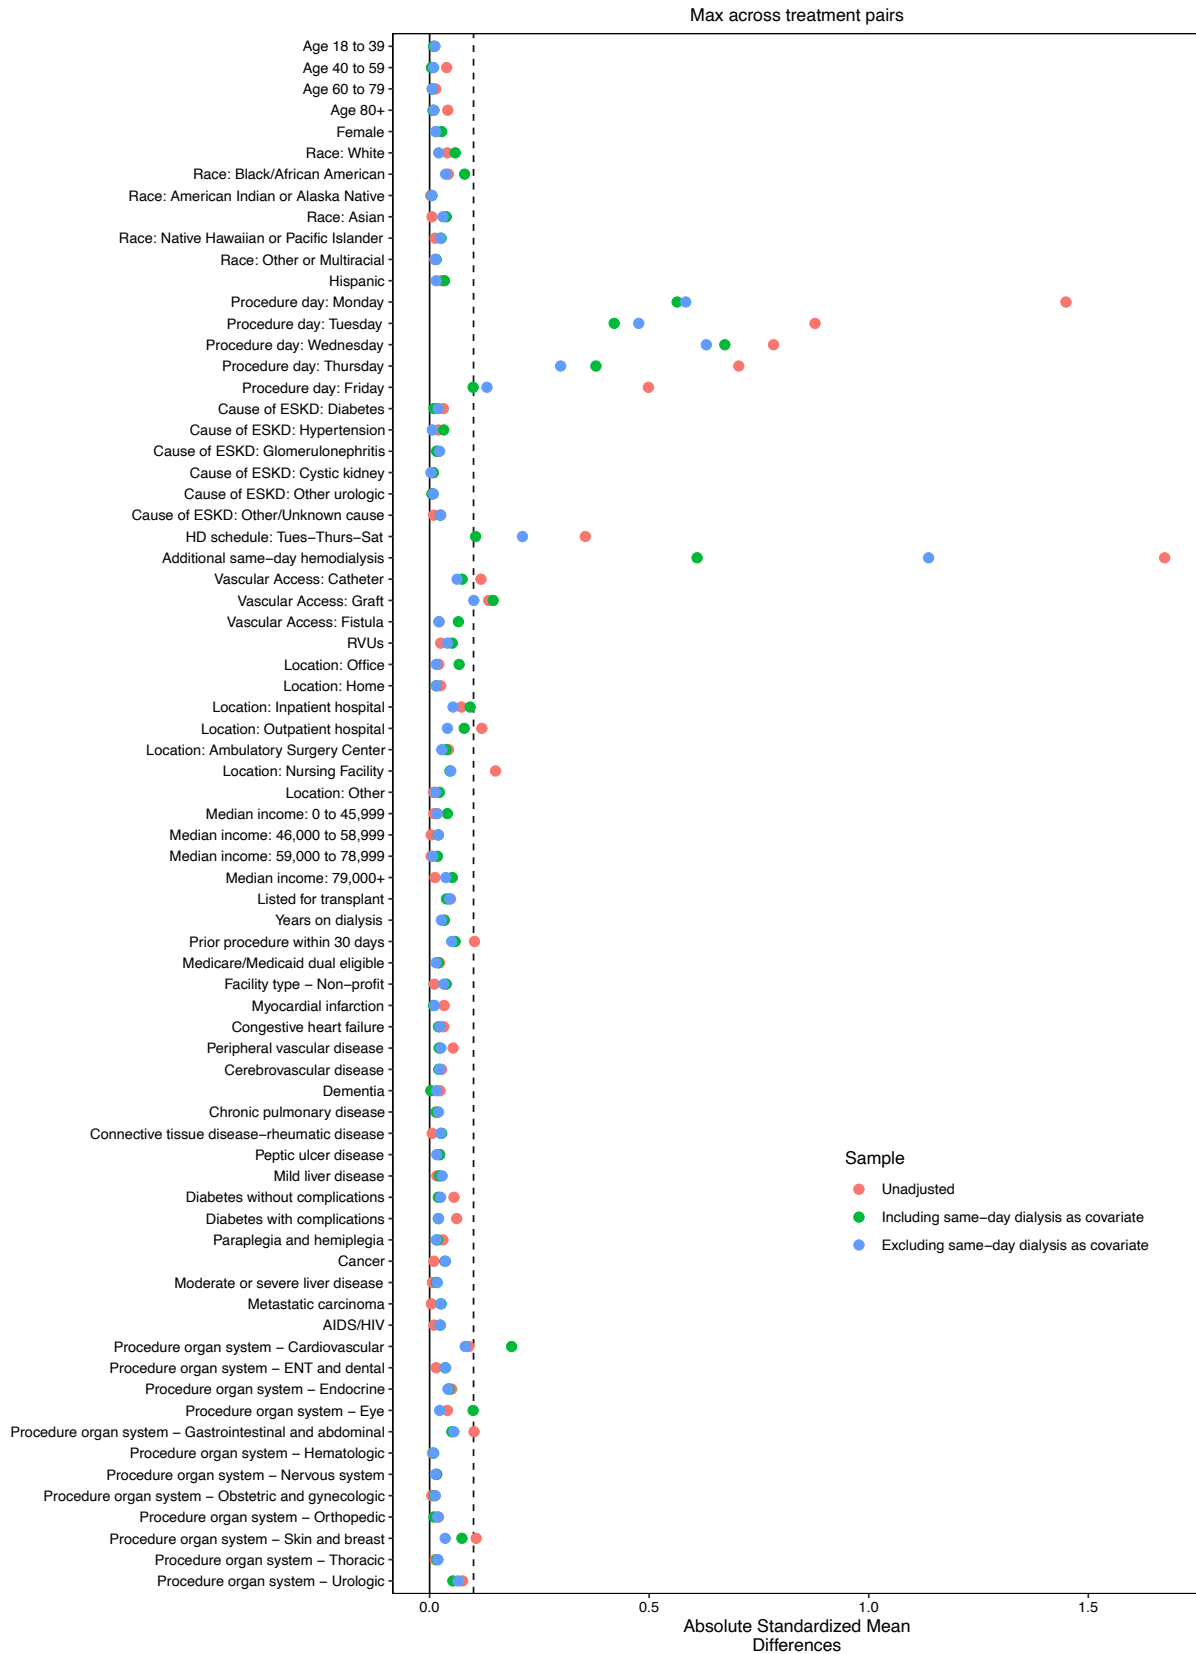

## eReferences

1. Clinical Classifications Software for Services and Procedures. Healthcare Cost and Utilization Project (HCUP). May 2021. Agency for Healthcare Research and Quality, Rockville, MD. Accessed July 5, 2021, [https://www.hcup-us.ahrq.gov/toolssoftware/ccs\\_svcsproc/ccssvcproc.jsp](https://www.hcup-us.ahrq.gov/toolssoftware/ccs_svcsproc/ccssvcproc.jsp)
2. Quan H, Sundararajan V, Halfon P, et al. Coding algorithms for defining comorbidities in ICD-9-CM and ICD-10 administrative data. *Med Care*. Nov 2005;43(11):1130-9.
3. United States Census Bureau. American Community Survey 5-Year Median Income Tables - Table S1903. Accessed October 5, 2021, [data.census.gov](https://data.census.gov)
4. Kalbfleisch JD, Prentice RL. *The Statistical Analysis of Failure Time Data*. 2nd ed. Wiley; 2002.
5. Thomas LE, Li F, Pencina MJ. Overlap Weighting: A Propensity Score Method That Mimics Attributes of a Randomized Clinical Trial. *JAMA*. 2020;323(23):2417-2418. doi:10.1001/jama.2020.7819
6. Wright MN, Ziegler A. ranger: A Fast Implementation of Random Forests for High Dimensional Data in C++ and R. *Journal of Statistical Software*. 03/31 2017;77(1):1 - 17. doi:10.18637/jss.v077.i01
7. Textor J, van der Zander B, Gilthorpe MS, Liskiewicz M, Ellison GT. Robust causal inference using directed acyclic graphs: the R package 'dagitty'. *Int J Epidemiol*. Dec 1 2016;45(6):1887-1894. doi:10.1093/ije/dyw341
